# Supplementary material
Source: PubMed Central journal article supplement (PMC2645026)
Supplement: NIHMS83605-supplement-01.pdf [file NIHMS83605-supplement-01.pdf]

1  
2  
3  
4  
5  
6  
7  
8  
9  
10  
11  
12  
13  
14  
15  
16  
17  
18  
19  
20  
21  
22  
23  
24  
25  
26  
27  
28  
29  
30  
31  
32  
33  
34  
35  
36  
37  
38  
39  
40  
41  
42  
43  
44  
45  
46  
47  
48  
49  
50  
51  
52  
53  
54  
55  
56  
57  
58  
59  
60  
61  
62  
63  
64  
65

**Supplementary Table 1**

| Name of Primer | Sequences of Primer                  |
|----------------|--------------------------------------|
| TR1            | 5'-GCCAATGGCACTTCCAG - 3'            |
| TR2            | 5'-CTGTAAACTATGTCGCCAC - 3'          |
| TR3            | 5'-TTTTATAGAGCGCTTTATCCTA - 3'       |
| TR5            | 5'-GCAGACCCAGTAGTCCGGGC - 3'         |
| TR6            | 5'-TTTATCTGGAGATGTAGGTGTATGTCCG - 3' |
| TR9            | 5'-ATGCCTTCGCTGCGATGC - 3'           |
| TR15           | 5'-TAGCTTGCTGAGAGTTTCCG - 3'         |
| TR20           | 5'-ATTACAGTCTTCTCTCTCTGAGG - 3'      |
| TR22           | 5'-TCTTCATAGCAGTGCTTGTTAGAC - 3'     |
| M2TR5          | 5'-ATGGAGCCCGACTCGGTG - 3'           |
| M2TR6          | 5'-TAGTTCCCCTCTGACGG - 3'            |
